# Supplementary material for: Differences in Heart Graft Survival by Recipient Sex
Source: PubMed Central journal article supplement — Transplant Direct. 2021 Sep 7;7(10):e749. doi: 10.1097/TXD.0000000000001110 (PMC8425832; doi:10.1097/txd.0000000000001110), 2021-09-07
Supplement: txd-7-e749-s001.pdf [file txd-7-e749-s001.pdf]

**SUPPLEMENTARY MATERIALS**

**Table S1a. Ventricular assist device use by heart recipient sex and age among recipients of a male donor transplanted in 2003 or later (N=25458)**

|                                    | 0-12 years      |               | 13-24 years     |               | 25-44 years     |               | ≥ 45 years      |               |
|------------------------------------|-----------------|---------------|-----------------|---------------|-----------------|---------------|-----------------|---------------|
|                                    | Females<br>(MF) | Males<br>(MM) | Females<br>(MF) | Males<br>(MM) | Females<br>(MF) | Males<br>(MM) | Females<br>(MF) | Males<br>(MM) |
| <b>Person-years of observation</b> | 5424            | 5902          | 3371            | 6365          | 4518            | 14516         | 14788           | 92246         |
| <b>Ventricular assist device</b>   | 14.8            | 16.1          | 20.0            | 32.8          | 31.9            | 47.0          | 26.3            | 38.1          |
| Missing (%)                        | 0               | 0             | 0               | 0             | 0               | 0.03          | 0               | 0.1           |

**Table S1b. Ventricular assist device use by heart recipient sex and age among recipients of a female donor transplanted in 2003 or later (N=11355)**

|                                    | 0-12 years      |               | 13-24 years     |               | 25-44 years     |               | ≥ 45 years      |               |
|------------------------------------|-----------------|---------------|-----------------|---------------|-----------------|---------------|-----------------|---------------|
|                                    | Females<br>(FF) | Males<br>(FM) | Females<br>(FF) | Males<br>(FM) | Females<br>(FF) | Males<br>(FM) | Females<br>(FF) | Males<br>(FM) |
| <b>Person-years of observation</b> | 4225            | 4472          | 2987            | 3204          | 5109            | 3379          | 18010           | 22555         |

|                                  |      |      |      |      |      |      |      |      |
|----------------------------------|------|------|------|------|------|------|------|------|
| <b>Ventricular assist device</b> | 14.5 | 11.9 | 20.0 | 23.5 | 29.8 | 37.8 | 24.8 | 30.0 |
| Missing (%)                      | 0    | 0.04 | 0    | 0.3  | 0    | 0.1  | 0.1  | 0.04 |

**Table S2: Comparison of heart graft failure rates by recipient sex, limited to recipients transplanted in 2003 or later**

| <b>Age interval</b> | <b>Male donor<br/>aHR (95% confidence interval)</b> | <b>Female donor<br/>aHR (95% confidence interval)</b> |
|---------------------|-----------------------------------------------------|-------------------------------------------------------|
| <b>0-12 years</b>   | 1.37 (0.87, 2.15)                                   | 0.92 (0.54, 1.56)                                     |
| <b>13-24 years</b>  | 1.38 (0.89, 2.15)                                   | 1.68 (0.96, 2.93)                                     |
| <b>25-44 years</b>  | 1.39 (0.92, 2.10)                                   | 0.91 (0.54, 1.52)                                     |
| <b>≥45 years</b>    | 1.10 (0.94, 1.28)                                   | 0.93 (0.77, 1.11)                                     |

Adjusted hazard ratios (aHR) represent the hazards in female recipients relative to those in male recipients in the same age interval. The model was adjusted for recipient race, primary heart disease, donor age, donor race, donor:recipient weight ratio, medical condition at transplant, use of a ventricular assist device and era of transplant.

**Table S3: Comparison of heart graft failure rates by recipient sex, adjusted for donor:recipient predicted heart mass ratio**

| <b>Age interval</b> | <b>Male donor<br/>aHR (95% confidence interval)</b> | <b>Female donor<br/>aHR (95% confidence interval)</b> |
|---------------------|-----------------------------------------------------|-------------------------------------------------------|
| <b>18-24 years</b>  | 1.46 (0.83, 2.56)                                   | 1.21 (0.60, 2.43)                                     |
| <b>25-44 years</b>  | 1.29 (0.90, 1.83)                                   | 1.08 (0.72, 1.60)                                     |
| <b>≥45 years</b>    | 1.17 (1.02, 1.35)                                   | 1.07 (0.92, 1.23)                                     |

Adjusted hazard ratios (aHR) represent the hazards in female recipients relative to those in male recipients in the same age interval. The model was adjusted for recipient race, primary heart disease, donor age, donor race, donor:recipient predicted heart mass ratio, medical condition at transplant, use of a ventricular assist device, and era of transplant.

Figure S1. Crude absolute graft failure rates by donor-recipient sex combination

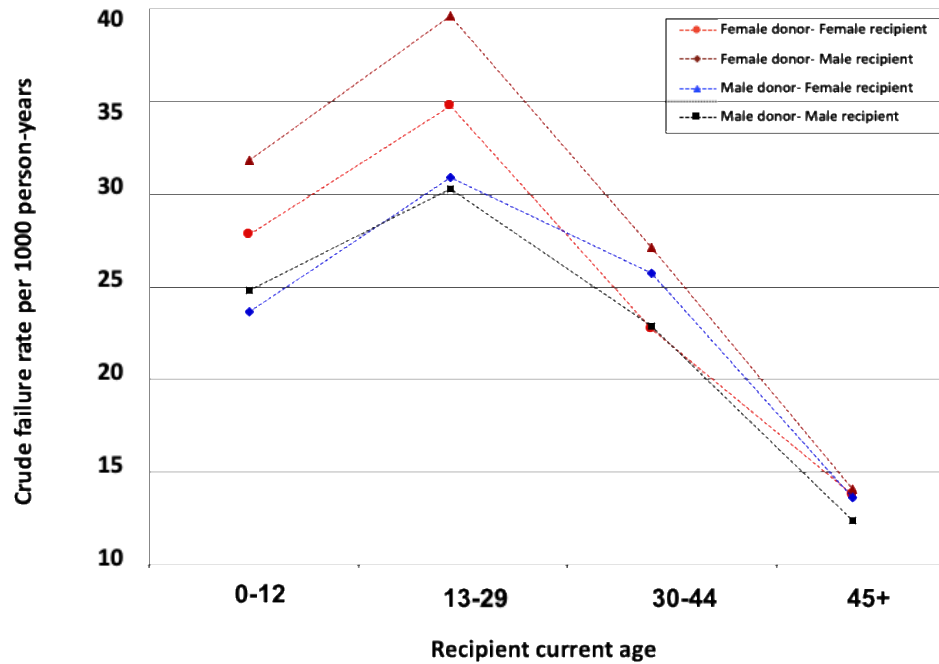

**Figure S1: Crude absolute HEART graft failure rates by donor-recipient sex combination**-Fitted graft failure rates (failures per 1000 person-years) within each current age interval (0-12, 13-29, 30-44,  $\geq 45$  years) are shown for each donor-recipient sex combination. These estimates do not take timing of failures into consideration. Because more males than females receive heart transplants, a greater proportion of the person-years for males than females in each age interval are from the first month post-transplant, when failure rates are highest. This biases towards higher apparent failure rates in males.
